# Supplementary material for: Reduced overtriage and undertriage with a new triage system in an urban accident and emergency department in Botswana: a cohort study
Source: HighWire-hosted journal article supplement (doi:10.1136/emermed-2012-201900), 2013-02-13
Supplement: emermed-2012-201900supp1.pdf [file emermed-2012-201900supp1.pdf]

**Supplement 5. Study quality and risk of bias assessment**

| No. | Study (year)                | External validity |   |   | Internal validity |   |   |   |   |   | 11 <sup>b</sup> |   |          |
|-----|-----------------------------|-------------------|---|---|-------------------|---|---|---|---|---|-----------------|---|----------|
|     |                             | 1                 | 2 | 3 | 4                 | 5 | 6 | 7 | 8 | 9 |                 |   | 10       |
| 1   | Hepner et al. (2002)[61]    | 1                 | 1 | 1 | 1                 | 0 | 0 | 1 | 0 | 0 | 0               | 5 | Moderate |
| 2   | Pinn & Pallett (2002)[62]   | 1                 | 1 | 1 | 1                 | 0 | 1 | 1 | 0 | 0 | 0               | 6 | Moderate |
| 3   | Nordeng & Havnen (2004)[63] | 1                 | 1 | 1 | 0                 | 0 | 0 | 1 | 0 | 0 | 0               | 4 | Moderate |
| 4   | Forster et al. (2006)[64]   | 1                 | 1 | 1 | 0                 | 0 | 0 | 0 | 0 | 0 | 1               | 4 | Moderate |
| 5   | Chuang et al. (2007)[165]   | 0                 | 0 | 0 | 0                 | 0 | 0 | 1 | 0 | 1 | 0               | 2 | Low      |
| 6   | Sawalha (2007)[65]          | 1                 | 1 | 1 | 1                 | 0 | 0 | 0 | 0 | 0 | 1               | 5 | Moderate |
| 7   | Ologe et al., (2008)[66]    | 1                 | 1 | 1 | 1                 | 0 | 1 | 0 | 0 | 0 | 0               | 5 | Moderate |
| 8   | Rahman et al., (2008)[67]   | 1                 | 1 | 0 | 1                 | 0 | 0 | 0 | 0 | 1 | 0               | 4 | Moderate |
| 9   | Chuang et al., (2009)[68]   | 0                 | 0 | 0 | 0                 | 0 | 0 | 1 | 0 | 1 | 0               | 2 | Low      |
| 10  | Fakeye et al., (2009)[69]   | 1                 | 1 | 1 | 0                 | 0 | 0 | 0 | 1 | 0 | 0               | 4 | Moderate |
| 11  | Holst et al. (2009)[70]     | 1                 | 1 | 1 | 1                 | 0 | 0 | 0 | 0 | 0 | 0               | 4 | Moderate |
| 12  | Rahman et al. (2009)[71]    | 1                 | 1 | 0 | 1                 | 0 | 0 | 1 | 0 | 1 | 0               | 5 | Moderate |
| 13  | Bercaw et al. (2010)[72]    | 1                 | 1 | 1 | 1                 | 0 | 0 | 1 | 0 | 0 | 0               | 5 | Moderate |
| 14  | Cuzzolin et al. (2010)[73]  | 1                 | 1 | 1 | 0                 | 0 | 0 | 0 | 0 | 0 | 0               | 3 | Low      |
| 15  | Lapi et al. (2010)[74]      | 1                 | 1 | 1 | 0                 | 0 | 0 | 0 | 0 | 0 | 0               | 3 | Low      |
| 16  | Nordeng et al. (2010)[75]   | 1                 | 0 | 1 | 1                 | 0 | 1 | 1 | 0 | 1 | 0               | 6 | Moderate |
| 17  | Pereira et al. (2010)[76]   | 1                 | 1 | 1 | 0                 | 0 | 1 | 0 | 0 | 0 | 1               | 5 | Moderate |
| 18  | Bello et al. (2011)[77]     | 1                 | 1 | 1 | 1                 | 0 | 1 | 1 | 0 | 0 | 0               | 6 | Moderate |
| 19  | Kalder et al. (2011)[78]    | 1                 | 1 | 1 | 1                 | 0 | 1 | 0 | 0 | 0 | 0               | 5 | Moderate |

| No. | Study (year)                     | External validity |   |   | Internal validity |   |   |   |   |   | 11 <sup>b</sup> |   |          |
|-----|----------------------------------|-------------------|---|---|-------------------|---|---|---|---|---|-----------------|---|----------|
|     |                                  | 1                 | 2 | 3 | 4                 | 5 | 6 | 7 | 8 | 9 |                 |   | 10       |
| 20  | Nordeng et al. (2011)[79]        | 1                 | 1 | 1 | 0                 | 0 | 0 | 1 | 0 | 0 | 0               | 4 | Moderate |
| 21  | Tabatabaee (2011)[80]            | 1                 | 1 | 1 | 0                 | 0 | 0 | 0 | 0 | 0 | 0               | 3 | Low      |
| 22  | Tamuno et al. (2011)[81]         | 1                 | 1 | 1 | 0                 | 0 | 0 | 0 | 1 | 0 | 1               | 5 | Moderate |
| 23  | Yusuff et al. (2011)[82]         | 1                 | 1 | 1 | 0                 | 0 | 1 | 0 | 0 | 0 | 1               | 5 | Moderate |
| 24  | Facchinetti et al. (2012)[166]   | 1                 | 1 | 1 | 0                 | 0 | 0 | 0 | 0 | 0 | 0               | 3 | Low      |
| 25  | Hashem et al. (2012)[83]         | 1                 | 0 | 1 | 0                 | 0 | 1 | 0 | 0 | 0 | 0               | 3 | Low      |
| 26  | Khadivzadeh & Ghabel (2012)[84]  | 1                 | 1 | 1 | 1                 | 0 | 0 | 0 | 1 | 0 | 0               | 5 | Moderate |
| 27  | Moussally & Berard (2012)[167]   | 1                 | 0 | 1 | 1                 | 0 | 0 | 1 | 0 | 1 | 0               | 5 | Moderate |
| 28  | Sattari et al. (2012)[51]        | 1                 | 1 | 1 | 1                 | 0 | 1 | 1 | 1 | 1 | 0               | 8 | High     |
| 29  | Al-Ramahi et al. (2013)[85]      | 1                 | 1 | 0 | 0                 | 0 | 0 | 0 | 0 | 0 | 1               | 3 | Low      |
| 30  | Frawley et al. (2013)[168]       | 0                 | 0 | 0 | 0                 | 0 | 0 | 1 | 0 | 1 | 0               | 2 | Low      |
| 31  | Gardiner et al. (2013)[86]       | 1                 | 1 | 1 | 1                 | 0 | 0 | 1 | 0 | 0 | 0               | 5 | Moderate |
| 32  | Kennedy et al. (2013)[87]        | 1                 | 1 | 1 | 0                 | 0 | 0 | 0 | 0 | 1 | 1               | 5 | Moderate |
| 33  | Teoh et al. (2013)[88]           | 1                 | 1 | 1 | 1                 | 0 | 0 | 1 | 0 | 0 | 0               | 5 | Moderate |
| 34  | Bayisa et al. (2014)[52]         | 1                 | 1 | 1 | 1                 | 0 | 1 | 1 | 1 | 0 | 1               | 8 | High     |
| 35  | Emmanuel et al. (2014)[89]       | 1                 | 1 | 1 | 1                 | 0 | 1 | 0 | 1 | 0 | 0               | 6 | Moderate |
| 36  | Hall & Jolly (2014)[90]          | 1                 | 1 | 1 | 0                 | 0 | 0 | 0 | 1 | 0 | 0               | 4 | Moderate |
| 37  | Mothupi (2014)[91]               | 1                 | 1 | 1 | 0                 | 0 | 0 | 1 | 0 | 1 | 0               | 5 | Moderate |
| 38  | Orief et al. (2014)[92]          | 1                 | 1 | 1 | 1                 | 0 | 1 | 0 | 0 | 0 | 0               | 5 | Moderate |
| 39  | Pallivalappila et al. (2014)[93] | 1                 | 1 | 1 | 1                 | 0 | 0 | 0 | 0 | 0 | 0               | 4 | Moderate |

| No. | Study (year)                     | External validity |   |   | Internal validity |   |   |   |   |   | 11 <sup>b</sup> |   |          |
|-----|----------------------------------|-------------------|---|---|-------------------|---|---|---|---|---|-----------------|---|----------|
|     |                                  | 1                 | 2 | 3 | 4                 | 5 | 6 | 7 | 8 | 9 |                 |   | 10       |
| 40  | Zaki & Albarraq (2014)[94]       | 1                 | 1 | 1 | 1                 | 0 | 1 | 0 | 1 | 0 | 0               | 6 | Moderate |
| 41  | Adusi-Poku et al. (2015)[95]     | 1                 | 1 | 0 | 0                 | 0 | 0 | 1 | 1 | 0 | 0               | 4 | Moderate |
| 42  | Afshary et al. (2015)[96]        | 1                 | 0 | 0 | 1                 | 0 | 1 | 0 | 0 | 0 | 1               | 4 | Moderate |
| 43  | Ali-Shtayeh et al. (2015)[97]    | 1                 | 1 | 0 | 0                 | 0 | 1 | 0 | 0 | 1 | 0               | 4 | Moderate |
| 44  | Bello & Isah (2015)[98]          | 1                 | 1 | 0 | 0                 | 0 | 1 | 0 | 1 | 0 | 0               | 4 | Moderate |
| 45  | Elberry et al. (2015)[99]        | 1                 | 1 | 1 | 0                 | 0 | 1 | 1 | 0 | 0 | 1               | 6 | Moderate |
| 46  | Mugomeri et al. (2015)[100]      | 1                 | 1 | 1 | 1                 | 0 | 1 | 0 | 1 | 0 | 0               | 6 | Moderate |
| 47  | Nergard et al. (2015)[101]       | 1                 | 1 | 1 | 0                 | 0 | 0 | 1 | 0 | 1 | 1               | 6 | Moderate |
| 48  | Pallivalapila et al. (2015)[102] | 1                 | 1 | 1 | 0                 | 0 | 0 | 0 | 0 | 0 | 0               | 3 | Low      |
| 49  | Budzynska et al. (2016)[169]     | 1                 | 1 | 1 | 0                 | 0 | 1 | 1 | 0 | 0 | 1               | 6 | Moderate |
| 50  | de Araujo et al. (2016)[53]      | 1                 | 1 | 1 | 1                 | 0 | 1 | 1 | 1 | 0 | 1               | 8 | High     |
| 51  | Elkhoudri et al. (2016)[54]      | 1                 | 1 | 1 | 1                 | 0 | 0 | 1 | 0 | 1 | 1               | 7 | High     |
| 52  | Hanafy et al. (2016)[103]        | 1                 | 1 | 1 | 1                 | 0 | 1 | 0 | 0 | 0 | 0               | 5 | Moderate |
| 53  | Hwang et al. (2016)[104]         | 1                 | 1 | 1 | 0                 | 0 | 1 | 0 | 0 | 0 | 1               | 5 | Moderate |
| 54  | Laelago et al. (2016)[105]       | 1                 | 1 | 1 | 1                 | 0 | 1 | 0 | 0 | 0 | 0               | 5 | Moderate |
| 55  | Mbarambara et al. (2016)[106]    | 1                 | 0 | 0 | 1                 | 0 | 1 | 1 | 0 | 0 | 0               | 4 | Moderate |
| 56  | Tang et al. (2016)[170]          | 1                 | 1 | 1 | 0                 | 0 | 0 | 0 | 0 | 0 | 0               | 3 | Low      |
| 57  | Varghese et al. (2016)[107]      | 1                 | 1 | 1 | 1                 | 0 | 1 | 1 | 0 | 0 | 0               | 6 | Moderate |
| 58  | Yusof et al. (2016)[108]         | 1                 | 1 | 1 | 1                 | 0 | 1 | 0 | 1 | 0 | 0               | 6 | Moderate |
| 59  | Al-Ghamdi et al. (2017)[109]     | 1                 | 1 | 1 | 0                 | 0 | 1 | 0 | 0 | 1 | 1               | 6 | Moderate |

| No. | Study (year)                     | External validity |   |   | Internal validity |   |   |   |   |   |    | 11 <sup>b</sup> |          |
|-----|----------------------------------|-------------------|---|---|-------------------|---|---|---|---|---|----|-----------------|----------|
|     |                                  | 1                 | 2 | 3 | 4                 | 5 | 6 | 7 | 8 | 9 | 10 |                 |          |
| 60  | Alsubaie et al. (2017)[110]      | 1                 | 1 | 0 | 1                 | 0 | 1 | 0 | 0 | 1 | 1  | 6               | Moderate |
| 61  | Barisic et al. (2017)[111]       | 1                 | 1 | 1 | 1                 | 0 | 1 | 1 | 0 | 0 | 0  | 6               | Moderate |
| 62  | Cabut et al. (2017)[112]         | 1                 | 1 | 1 | 1                 | 0 | 1 | 1 | 0 | 0 | 0  | 6               | Moderate |
| 63  | Kissal et al. (2017)[113]        | 1                 | 1 | 1 | 1                 | 0 | 1 | 1 | 0 | 0 | 0  | 6               | Moderate |
| 64  | Koc et al. (2017)[114]           | 1                 | 1 | 1 | 1                 | 0 | 1 | 0 | 0 | 0 | 0  | 5               | Moderate |
| 65  | Mekuria et al. (2017)[115]       | 1                 | 1 | 0 | 0                 | 0 | 1 | 0 | 0 | 0 | 0  | 3               | Low      |
| 66  | Onyapat et al. (2017)[116]       | 1                 | 1 | 0 | 0                 | 0 | 1 | 1 | 0 | 0 | 1  | 5               | Moderate |
| 67  | Ahmed et al. (2018)[117]         | 1                 | 1 | 1 | 0                 | 0 | 0 | 0 | 0 | 0 | 0  | 3               | Low      |
| 68  | Alonso-Castro et al. (2018)[118] | 1                 | 1 | 1 | 1                 | 0 | 1 | 0 | 0 | 1 | 0  | 6               | Moderate |
| 69  | Ameade et al. (2018)[119]        | 1                 | 0 | 1 | 1                 | 0 | 1 | 1 | 1 | 0 | 0  | 6               | Moderate |
| 70  | Beyene & Beza (2018)[162]        | 1                 | 0 | 0 | 0                 | 0 | 1 | 0 | 0 | 0 | 1  | 3               | Low      |
| 71  | Botyar et al. (2018)[120]        | 1                 | 1 | 0 | 1                 | 0 | 0 | 1 | 0 | 1 | 0  | 5               | Moderate |
| 72  | Jambo et al. (2018)[121]         | 1                 | 1 | 1 | 0                 | 0 | 1 | 0 | 0 | 0 | 0  | 4               | Moderate |
| 73  | James et al. (2018)[122]         | 1                 | 1 | 1 | 0                 | 0 | 1 | 0 | 0 | 0 | 0  | 4               | Moderate |
| 74  | Marwa et al. (2018)[123]         | 1                 | 1 | 0 | 0                 | 0 | 1 | 0 | 0 | 0 | 0  | 3               | Low      |
| 75  | Rafiee et al. (2018)[124]        | 1                 | 1 | 1 | 1                 | 0 | 1 | 0 | 0 | 0 | 0  | 5               | Moderate |
| 76  | Tahery et al. (2018)[125]        | 1                 | 1 | 0 | 1                 | 0 | 1 | 0 | 0 | 0 | 1  | 5               | Moderate |
| 77  | Abdollahi & Yazdani (2019)[126]  | 1                 | 1 | 1 | 1                 | 0 | 0 | 0 | 0 | 0 | 1  | 5               | Moderate |
| 78  | Al Essa et al. (2019)[127]       | 1                 | 1 | 1 | 1                 | 0 | 1 | 0 | 0 | 0 | 0  | 5               | Moderate |
| 79  | Biazar et al. (2019)[128]        | 1                 | 1 | 1 | 1                 | 0 | 0 | 0 | 0 | 0 | 1  | 5               | Moderate |

| No. | Study (year)                     | External validity |   |   | Internal validity |   |   |   |   |   | 11 <sup>b</sup> |   |          |
|-----|----------------------------------|-------------------|---|---|-------------------|---|---|---|---|---|-----------------|---|----------|
|     |                                  | 1                 | 2 | 3 | 4                 | 5 | 6 | 7 | 8 | 9 |                 |   | 10       |
| 80  | Nega et al. (2019)[129]          | 1                 | 1 | 1 | 0                 | 0 | 0 | 0 | 0 | 0 | 1               | 4 | Moderate |
| 81  | Saber et al. (2019)[130]         | 1                 | 1 | 0 | 1                 | 0 | 1 | 1 | 0 | 0 | 1               | 6 | Moderate |
| 82  | Yazdi et al. (2019)[131]         | 1                 | 1 | 1 | 1                 | 0 | 1 | 0 | 0 | 0 | 0               | 5 | Moderate |
| 83  | Zaitoun et al. (2019)[55]        | 1                 | 1 | 1 | 1                 | 0 | 0 | 1 | 0 | 1 | 1               | 7 | High     |
| 84  | Ahmed et al. (2020a)[27]         | 1                 | 1 | 1 | 0                 | 0 | 1 | 0 | 0 | 0 | 0               | 4 | Moderate |
| 85  | Ahmed et al. (2020b)[132]        | 1                 | 1 | 1 | 0                 | 0 | 1 | 0 | 0 | 0 | 1               | 5 | Moderate |
| 86  | Aljofan & Alkhamaiseh (2020)[56] | 1                 | 1 | 1 | 1                 | 0 | 1 | 0 | 1 | 1 | 0               | 7 | High     |
| 87  | El Hajj et al. (2020)[133]       | 1                 | 1 | 1 | 0                 | 0 | 0 | 0 | 0 | 0 | 0               | 3 | Low      |
| 88  | Gbagbo & Nkrumah (2020)[163]     | 1                 | 0 | 1 | 1                 | 0 | 1 | 0 | 0 | 0 | 0               | 4 | Moderate |
| 89  | Kekana & Sebitloane (2020)[134]  | 1                 | 1 | 1 | 1                 | 0 | 1 | 1 | 0 | 0 | 0               | 6 | Moderate |
| 90  | Obadeji et al. (2020)[135]       | 1                 | 1 | 1 | 1                 | 0 | 1 | 1 | 0 | 0 | 0               | 6 | Moderate |
| 91  | Pakseresht et al. (2020)[136]    | 1                 | 1 | 1 | 1                 | 0 | 1 | 0 | 0 | 0 | 1               | 6 | Moderate |
| 92  | Sema et al. (2020)[137]          | 1                 | 1 | 0 | 0                 | 0 | 0 | 0 | 0 | 0 | 0               | 2 | Low      |
| 93  | Tuha et al. (2020)[138]          | 1                 | 1 | 0 | 1                 | 0 | 0 | 0 | 0 | 0 | 0               | 3 | Low      |
| 94  | Adama et al. (2021)[139]         | 1                 | 1 | 0 | 1                 | 0 | 1 | 0 | 0 | 0 | 0               | 4 | Moderate |
| 95  | Addis et al. (2021)[164]         | 1                 | 0 | 0 | 0                 | 0 | 1 | 0 | 0 | 0 | 0               | 2 | Low      |
| 96  | Ake et al. (2021)[140]           | 1                 | 0 | 0 | 1                 | 0 | 1 | 0 | 0 | 0 | 0               | 3 | Low      |
| 97  | Almoayad et al. (2021)[57]       | 1                 | 1 | 1 | 1                 | 0 | 1 | 0 | 0 | 1 | 1               | 7 | High     |
| 98  | Alsous et al. (2021)[141]        | 1                 | 1 | 1 | 0                 | 0 | 1 | 0 | 0 | 0 | 0               | 4 | Moderate |
| 99  | Ayhan & Akalin (2021)[142]       | 1                 | 1 | 1 | 1                 | 0 | 0 | 1 | 0 | 1 | 0               | 6 | Moderate |

| No. | Study (year)                 | External validity |   |   | Internal validity |   |   |   |   |   | 11 <sup>b</sup> |   |          |
|-----|------------------------------|-------------------|---|---|-------------------|---|---|---|---|---|-----------------|---|----------|
|     |                              | 1                 | 2 | 3 | 4                 | 5 | 6 | 7 | 8 | 9 |                 |   | 10       |
| 100 | Babatunde et al. (2021)[143] | 1                 | 0 | 0 | 0                 | 0 | 1 | 0 | 0 | 0 | 0               | 2 | Low      |
| 101 | Bekele & Gonfa (2021)[144]   | 1                 | 0 | 0 | 0                 | 0 | 1 | 0 | 0 | 0 | 0               | 2 | Low      |
| 102 | da Matta et al. (2021)[145]  | 1                 | 1 | 1 | 1                 | 0 | 1 | 1 | 0 | 0 | 0               | 6 | Moderate |
| 103 | Emiru et al. (2021)[146]     | 1                 | 1 | 1 | 1                 | 0 | 1 | 0 | 0 | 0 | 1               | 6 | Moderate |
| 104 | Karimian et al. (2021)[147]  | 1                 | 1 | 0 | 0                 | 0 | 1 | 0 | 0 | 0 | 0               | 3 | Low      |
| 105 | Nnaemeka et al. (2021)[58]   | 1                 | 1 | 1 | 1                 | 0 | 1 | 1 | 1 | 1 | 0               | 8 | High     |
| 106 | Quzmar et al. (2021)[148]    | 1                 | 1 | 1 | 0                 | 0 | 1 | 0 | 1 | 1 | 0               | 6 | Moderate |
| 107 | Umar et al. (2021)[59]       | 1                 | 1 | 1 | 1                 | 0 | 1 | 1 | 1 | 0 | 1               | 8 | High     |
| 108 | Ahmed et al. (2022)[149]     | 1                 | 1 | 1 | 0                 | 0 | 1 | 0 | 0 | 0 | 0               | 4 | Moderate |
| 109 | Anteneh et al. (2022)[150]   | 1                 | 1 | 0 | 0                 | 0 | 0 | 0 | 0 | 1 | 1               | 4 | Moderate |
| 110 | Barnes et al. (2022)[151]    | 1                 | 1 | 1 | 1                 | 0 | 0 | 0 | 0 | 1 | 0               | 5 | Moderate |
| 111 | Bebitoglu et al. (2022)[152] | 1                 | 1 | 1 | 0                 | 0 | 1 | 0 | 0 | 0 | 0               | 4 | Moderate |
| 112 | Belayneh et al. (2022)[153]  | 1                 | 1 | 1 | 0                 | 0 | 1 | 0 | 0 | 0 | 0               | 4 | Moderate |
| 113 | Elba et al. (2022)[154]      | 1                 | 1 | 0 | 1                 | 0 | 1 | 1 | 1 | 0 | 0               | 6 | Moderate |
| 114 | Jahan et al. (2022)[155]     | 1                 | 1 | 0 | 0                 | 0 | 0 | 1 | 1 | 0 | 1               | 5 | Moderate |
| 115 | Kahssay et al. (2022)[156]   | 1                 | 1 | 0 | 0                 | 0 | 0 | 0 | 0 | 0 | 0               | 2 | Low      |
| 116 | Kamel et al. (2022)[157]     | 1                 | 1 | 1 | 1                 | 0 | 0 | 1 | 0 | 0 | 1               | 6 | Moderate |
| 117 | Mohamud (2022)[158]          | 1                 | 1 | 0 | 0                 | 0 | 1 | 0 | 0 | 0 | 0               | 3 | Low      |
| 118 | Saleh et al. (2022)[60]      | 1                 | 1 | 1 | 1                 | 0 | 1 | 1 | 1 | 0 | 0               | 7 | High     |
| 119 | Tesfaye et al. (2022)[159]   | 1                 | 0 | 0 | 0                 | 0 | 1 | 0 | 0 | 1 | 0               | 3 | Low      |

| No. | Study (year)              | External validity |   |   | Internal validity |   |   |   |   |   | 11 <sup>b</sup> |   |          |
|-----|---------------------------|-------------------|---|---|-------------------|---|---|---|---|---|-----------------|---|----------|
|     |                           | 1                 | 2 | 3 | 4                 | 5 | 6 | 7 | 8 | 9 |                 |   | 10       |
| 120 | Wake & Fitie (2022)[160]  | 1                 | 1 | 0 | 0                 | 0 | 0 | 0 | 0 | 0 | 0               | 2 | Low      |
| 121 | Isiiko et al. (2023)[161] | 1                 | 1 | 0 | 1                 | 0 | 1 | 0 | 0 | 0 | 0               | 4 | Moderate |

\*items adapted from Hoy et al.[42]

- 1) Was the study's target population a close representation of the general pregnant women in relation to relevant variables?
- 2) Was the sampling frame a true or close representation of the target population?
- 3) Was some form of random selection used to select the sample, OR was a census undertaken?
- 4) Was the likelihood of nonresponse bias minimal (response rate > 75%)?
- 5) Were data collected directly from the subjects (as opposed to a proxy)?
- 6) Was an acceptable case definition of HM used in the study?
- 7) Was the study instrument that measured the parameter of interest shown to have validity and reliability?
- 8) Was the same mode of data collection used for all subjects?
- 9) Was the length of the shortest prevalence period for the parameter of interest appropriate (survey of currently pregnant or women in perinatal period)?
- 10) Were the numerator(s) and denominator(s) for the parameter of interest (HM use and disclose rate) appropriate?
- 11) Summary of the item on the overall risk of study bias

<sup>a</sup> 0: low risk of bias; 1: high risk of bias

<sup>b</sup> 0–3: low risk; 4–6: moderate risk; 7–10: high risk
